# Supplementary material
Source: PubMed Central journal article supplement (PMC2836972)

**Supplementary Figure 1.** Clb2 oscillation and bipolar spindle assembly is not altered in *CDH1-pkm* cells. (A) Cells of the indicated genotype were synchronized with  $\alpha$ -factor block and released, and immunoblots performed against Clb2 and Pgc1. (B) Quantification of Clb2 levels from strains in (A), normalized to Pgc1. (C) *CDH1-pkm* strains form morphologically normal long and short spindles in an asynchronous population, assessed by fluorescence microscopy for the spindle-associated kinesin Cin8-GFP and the SPB marker Spc42-CFP (D) Percentage of asynchronous *CDH1* and *CDH1-pkm* cells with separated SPBs.

**Supplementary Figure 2.** Microscope field of terminally arrested *CDH1-m11* cells. *GALL-ACMI CDH1-m11* cells were released from  $\alpha$ -factor into glucose, and the above images taken in the indicated fluorescent channels at 120 minutes after release.

**Supplementary Figure 3.** *CDH1-m11* results in aberrant nuclear division in the absence of SPB separation. (A) Fluorescence microscopy of fixed *CDH1-m11* or *CDH1* cells 3 hours after release from  $\alpha$ -factor, imaging the nuclear histone protein Htb2-mCherry (red) and Myo1-GFP (green) marking the bud neck. Scale bars are 5 microns. (B) Frames from time lapse microscopy of the same strain at the indicated times after release from  $\alpha$ -factor, imaged for Htb2-mCherry. Note the ability to divide Htb2-mCherry asymmetrically, as well as the subsequent fusion of the two connected nuclear blobs. (C) *CDH1-m11* strains with Spc29-YFP marking the SPB as well as Tub1-CFP and HTB2-mCherry were released from  $\alpha$ -factor, with the depicted images taken 180 minutes after release. Aberrant nuclear morphology with unseparated SPBs are apparent. Adjusted CFP-channel contrast (bottom) reveals microtubule structures possibly responsible for aberrant nuclear migration and/or division. Scale bars are 5 microns.

**Supplementary Figure 4.** *CLB2-kd* induction in *CDH1-m11* cells approximately halves the intensity of fluorescent SPB foci. SPB intensity, assessed by an automated analysis, of the CFP-channel images from the experiment described and depicted in Figure 4 A-C, for indicated time points. At least 200 cells were analyzed and averaged for each data point.

**Supplementary Figure 5.** Maintenance of short bipolar spindles in *CDH1-m11* cells is dependent on *SCC1* but not *MAD2* (A) Micrographs of *mad2 CDH1-m11* or *mad2 CDH1* strains 120 minutes after release from  $\alpha$ -factor. Scale bars are 5 microns. (B) Images of *scc1-73 CDH1-m11* and *CDH1-m11* strains from Figure 4C obtained 120 minutes after  $\alpha$ -factor release. Scale bars are 5 microns.

**Supplementary Table 1**

| <b>Strain Name</b> | <b>Genotype</b>                                                                                                                         |
|--------------------|-----------------------------------------------------------------------------------------------------------------------------------------|
| 3023-2-1           | <i>MATa cdh1-m11::LEU2::URA3::cdh1-m11::TRP1</i>                                                                                        |
| 3023-2-2           | <i>MATa cdh1-m11::TRP1::URA3::cdh1-m11::LEU2</i>                                                                                        |
| JRC35B-8d          | <i>MATa cdh1-m11::LEU2::URA3::cdh1-m11::TRP1 cdc23-1</i>                                                                                |
| JRC36B-5d          | <i>MATa cdh1-m11::TRP1::URA3::cdh1-m11::LEU2 cdc23-1</i>                                                                                |
| JRC374A-5b         | <i>MATa GAL1-3FLAG-ACMI-URA3::ura3 ADE2</i>                                                                                             |
| JRC374C-3a         | <i>MATa GAL1-3FLAG-ACMI-URA3::ura3 acm1::KanMX ADE2</i>                                                                                 |
| MNX29-3b           | <i>MATa CDH1-m11 GAL1-3FLAG-ACMI-URA3::ura3</i>                                                                                         |
| MNX29-8b           | <i>MATa CDH1-m11 acm1::KanMX GAL1-3FLAG-ACMI-URA3::ura3</i>                                                                             |
| JRC258B-9c         | <i>MATa CDH1-pkm GAL1-3FLAG-ACMI-URA3::ura3 ADE2?</i>                                                                                   |
| JRC275B-11d        | <i>MATa CDH1-pkm GAL1-3FLAG-ACMI-URA3::ura3 acm1::KanMX</i>                                                                             |
| JRC362C-7c         | <i>MATa CDH1-pbm GAL1-3FLAG-ACMI-URA3::ura3</i>                                                                                         |
| JRC373D-6c         | <i>MATa bar1 CDH1-pbm GAL1-3FLAG-ACMI-URA3::ura3 acm1::KanMX</i>                                                                        |
| JRC307C-2c         | <i>MATa bar1 CDH1-m11 GALL-HA-ACMI-LEU2::leu2 MYO1-mCherry::HIS3 TRP1::CFP-TUB1</i>                                                     |
| JRC307A-2a         | <i>MATa bar1 CDH1 GALL-HA-ACMI-LEU2::leu2 MYO1-mCherry::HIS3 TRP1::CFP-TUB1</i>                                                         |
| JRC318A-9c         | <i>MATa bar1 CDH1 GALL-HA-ACMI-LEU2::leu2 HIS3::GFP-TUB1 SPC42-CFP-TRP1 MYO1-mCherry::HIS3 ADE2</i>                                     |
| JRC318A-11d        | <i>MATa bar1 CDH1-m11 GALL-HA-ACMI-LEU2::leu2 HIS3::GFP-TUB1 SPC42-CFP-TRP1 MYO1-mCherry::HIS3 ade2</i>                                 |
| JR313              | <i>MATa bar1 CDH1-m11 GALL-HA-ACMI-LEU2::leu2 HIS3::GFP-TUB1 SPC42-CFP-TRP1 MYO1-mCherry::HIS3 ACMI::URA3 ade2</i>                      |
| JR314              | <i>MATa bar1 CDH1-m11 GALL-HA-ACMI-LEU2::leu2 HIS3::GFP-TUB1 SPC42-CFP-TRP1 MYO1-mCherry::HIS3 4XACMI::URA3 ade2</i>                    |
| JR315              | <i>MATa bar1 CDH1-m11 GALL-HA-ACMI-LEU2::leu2 HIS3::GFP-TUB1 SPC42-CFP-TRP1 MYO1-mCherry::HIS3 2XACMI::URA3 ade2</i>                    |
| JRC330I-7b         | <i>MATa bar1 GALL-HA3-ACMI::LEU2 SPC42-CFP::TRP1 HIS3::GFP-TUB1 MYO1-mCherry::HIS3 acm1::KanMX</i>                                      |
| JRC395B-1b         | <i>MATa bar1 CDH1-m11 GALL-HA-ACMI-LEU2::leu2 SPC42-CFP-TRP1 HIS3::GFP-TUB1 MYO1-mCherry::HIS3 acm1::KanMX</i>                          |
| JRC430A-9a         | <i>MATa bar1 CDH1 GALL-HA-ACMI-LEU2::leu2 18MYC-CDC20-TRP1</i>                                                                          |
| JRC430A-5a         | <i>MATa bar1 CDH1-m11 GALL-HA-ACMI-LEU2::leu2 18MYC-CDC20-TRP1</i>                                                                      |
| JRC431B-4a         | <i>MATa bar1 CDH1 GALL-HA-ACMI-LEU2::leu2 PDS1-18MYC-LEU2</i>                                                                           |
| JRC431D-4b         | <i>MATa bar1 CDH1-m11 GALL-HA-ACMI-LEU2::leu2 PDS1-18MYC-LEU2</i>                                                                       |
| JRC389A-6d         | <i>MATa bar1 CDH1-m11 GALL-HA-ACMI-LEU2::leu2HTB2-mCherry-HIS5 SPC29-YFP-HIS3 CFP-TUB1-TRP1 MYO1-mCherry-HIS3</i>                       |
| JRC390A-5a         | <i>MATa bar1 CDH1-m11 GALL-HA-ACMI-LEU2::leu2HTB2-mCherry-HIS5 SPC29-YFP-HIS3 scc1-73 TRP+ ade2</i>                                     |
| JRC304             | <i>MATa bar1 CDH1 GALL-HA-ACMI-LEU2::leu2 HIS3::GFP-TUB1 SPC42-CFP-TRP1 MYO1-mCherry::HIS3 6MYC-CIN8::ura3::CIN8 ADE2</i>               |
| JRC306             | <i>MATa bar1 CDH1 GALL-HA-ACMI-LEU2::leu2 HIS3::GFP-TUB1 SPC42-CFP-TRP1 MYO1-mCherry::HIS3 6MYC-CIN8-alaKEN::ura3::CIN8 ADE2</i>        |
| JRC301             | <i>MATa bar1 CDH1-m11 GALL-HA-ACMI-LEU2::leu2 HIS3::GFP-TUB1 SPC42-CFP-TRP1 MYO1-mCherry::HIS3 6MYC-CIN8::ura3::CIN8 ade2</i>           |
| JRC303             | <i>MATa bar1 CDH1-m11 GALL-HA-ACMI-LEU2::leu2 HIS3::GFP-TUB1 SPC42-CFP-TRP1 MYO1-mCherry::HIS3 6MYC-CIN8-db::ura3::CIN8-alaKEN ade2</i> |
| JR325              | <i>MATa bar1 CDH1-m11 GALL-HA-ACMI-LEU2::leu2 HIS3::GFP-TUB1 SPC42-CFP-TRP1 MYO1-mCherry::HIS3 ade2 MET3pr-CLB2-kd::URA3</i>            |
| JR326              | <i>MATa bar1 CDH1 GALL-HA-ACMI-LEU2::leu2 HIS3::GFP-TUB1 SPC42-CFP-TRP1 MYO1-mCherry::HIS3 ade2 MET3pr-CLB2-kd::URA3</i>                |
| JRC370A-6d         | <i>MATa bar1 Clb2,kd trp1::TRP1::GAL1-SIC1(2X) HIS3:GFP-TUB1 SPC42-CFP::TRP1</i>                                                        |
| JR393A-2d          | <i>MATa bar1 CDH1-m11 GALL-HA-ACMI-LEU2::leu2 trp1::TRP1::GAL1-SIC1(2X)</i>                                                             |

|             |                                                                                                                     |
|-------------|---------------------------------------------------------------------------------------------------------------------|
|             | <i>CLB2-ken,db SPC42-CFP::TRP1 HIS3::GFP-TUB1 MYO1-mCherry::HIS3</i>                                                |
| JRC344F-12d | <i>MATa bar1 CIN8-GFP::URA3 SPC42-CFP::TRP1 acm1::KanMX</i>                                                         |
| JRC312A-5b  | <i>MATa bar1 CDH1-pkm CIN8-GFP::URA3 SPC42-CFP::TRP1 acm1::KanMX</i>                                                |
| JRC406B-4b  | <i>MATa bar1 CDH1 GALL-HA-ACM1-LEU2::leu2 HIS3::GFP-TUB1 SPC42-CFP-TRP1 MYO1-mCherry::HIS3 mad2::KanMX ade2</i>     |
| JRC406C-4b  | <i>MATa bar1 CDH1-m11 GALL-HA-ACM1-LEU2::leu2 HIS3::GFP-TUB1 SPC42-CFP-TRP1 MYO1-mCherry::HIS3 mad2::KanMX ade2</i> |
| JRC379A-4d  | <i>MATa bar1 CDH1-m11 GALL-HA-ACM1-LEU2::leu2 HT2B-mCherry-HIS5 MYO1-GFP-KanMX</i>                                  |
| JRC379A-1a  | <i>MATa bar1 CDH1 GALL-HA-ACM1-LEU2::leu2 HT2B-mCherry-HIS5 MYO1-GFP-KanMX</i>                                      |
| JRC388A-5c  | <i>MATa CDH1-11m HT2B-mCherry-HIS5 405-GALL-109 MYO1-mCherry::HIS3 SPC29-YFP-HIS3 CFP-TUB1-TRP1</i>                 |

**Supplementary Table 2**

| <b>Plasmid Name</b> | <b>Description</b>                              | <b>Plasmid Notes</b>                |
|---------------------|-------------------------------------------------|-------------------------------------|
| FC695               | pRS406 <i>cdh1-m11::TRP1</i>                    | cut with BglII to integrate at CDH1 |
| FC697               | pRS406 <i>cdh1-m11::LEU2</i>                    | cut with BglII to integrate at CDH1 |
| JRP67               | pRS 406 <i>CDH1-pkm (S125A-S259A)</i>           | cut with BglII to integrate at CDH1 |
| JRP90               | pRS 406 <i>CDH1-pbm (S15A-S41A-S156A-S172A)</i> | cut with BglII to integrate at CDH1 |
| 406-HLP112          | pRS 406 <i>GALI-3FLAG-ACM1</i>                  | cut with StuI to integrate at ura3  |
| 405-GALL-HLP109     | pRS 405 <i>GALL-HA-ACM1</i>                     | cut with XcmI to integrate at leu2  |
| DJC235              | pRS404 <i>18MYC-CDC20</i>                       | cut with MluI integrate at CDC20    |
| JRP87               | pRS406 <i>6MYC-CIN8</i>                         | cut with PacI to integrate at CIN8  |
| JRP88               | pRS406 <i>6MYC-CIN8 alaKEN</i>                  | cut with PacI to integrate at CIN8  |
| JRP89               | pRS406 <i>6MYC-CIN8-KED</i>                     | cut with PacI to integrate at CIN8  |
| JRP91               | pRS406 <i>ACM1</i>                              | cut with StuI to integrate at ura3  |
| JRP95               | pRS406 <i>MET3-CLB2-ken,db</i>                  | cut with StuI to integrate at ura3  |

**A**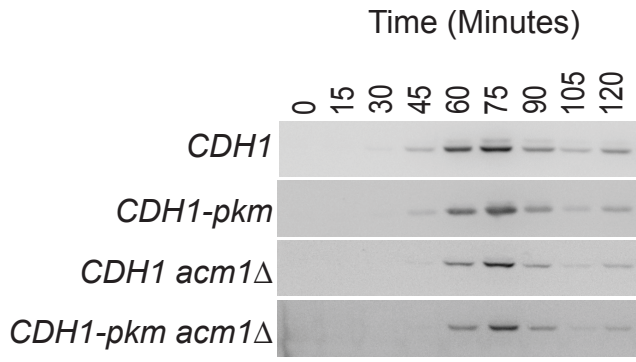**B**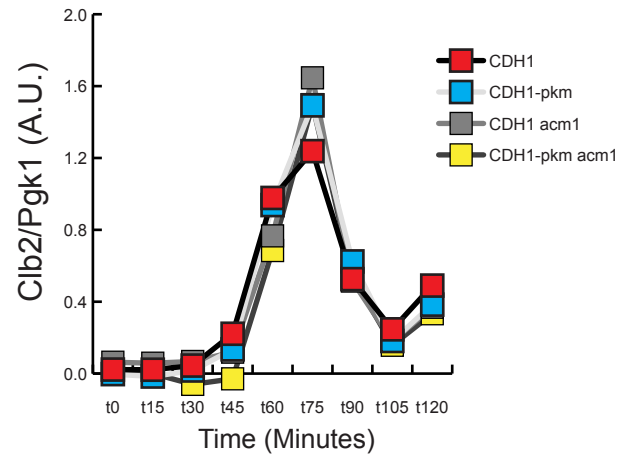**C**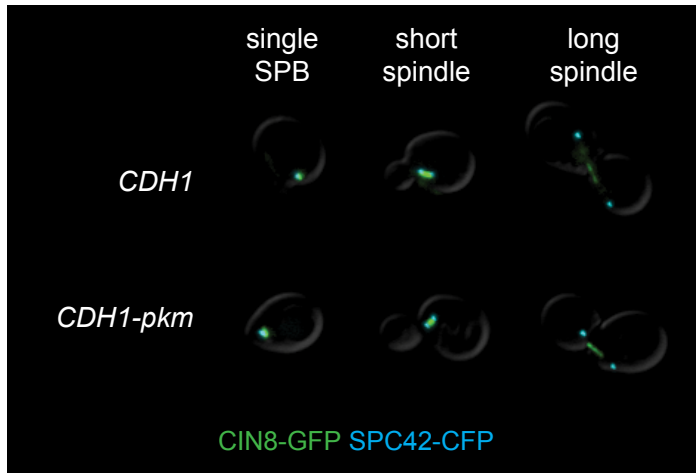**D**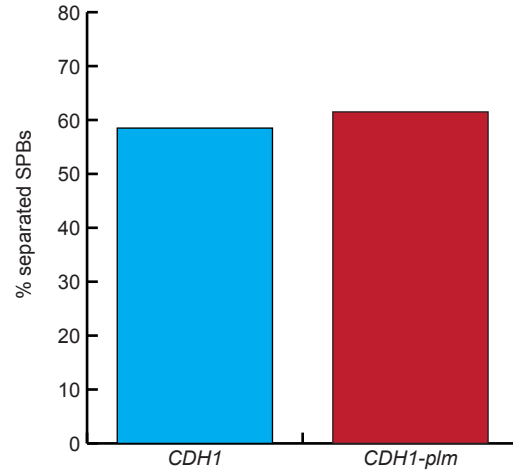

Spc42-CFP

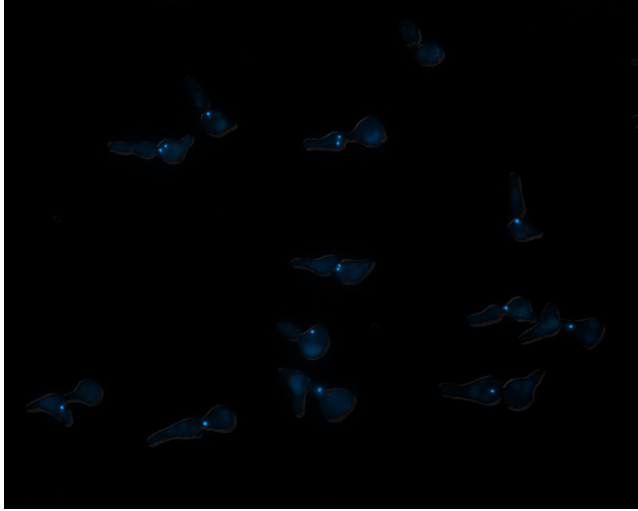

Tub1-GFP

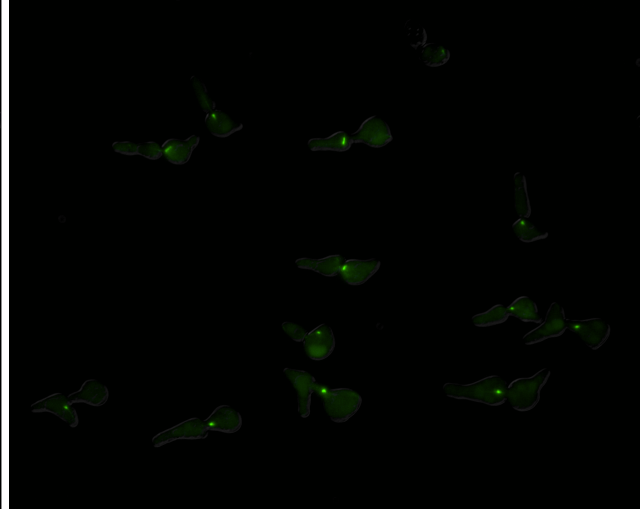

Myo1-mCherry

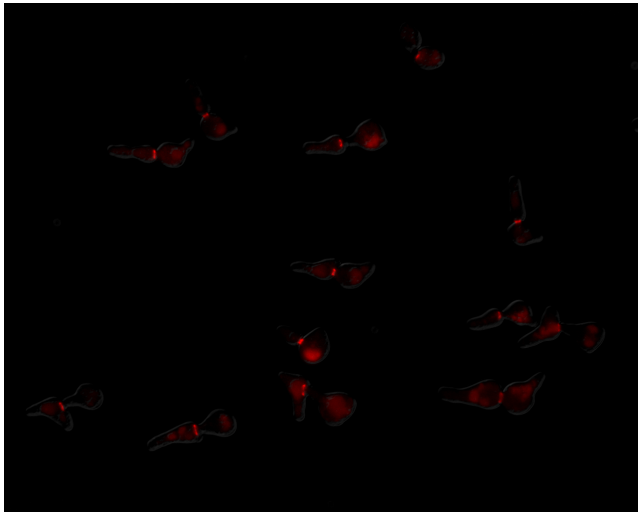

Merge

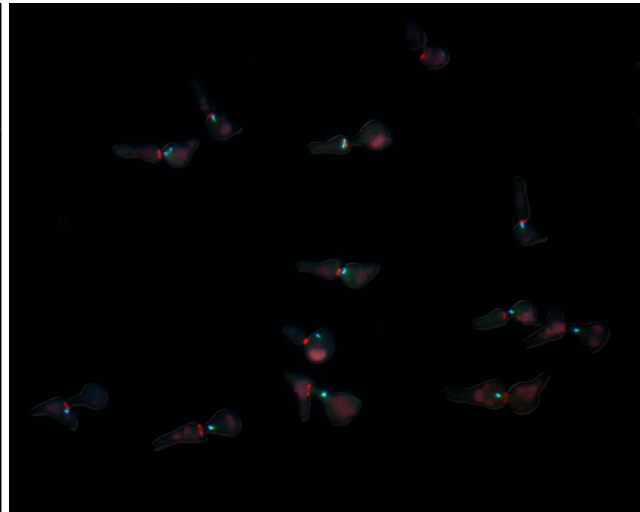

A

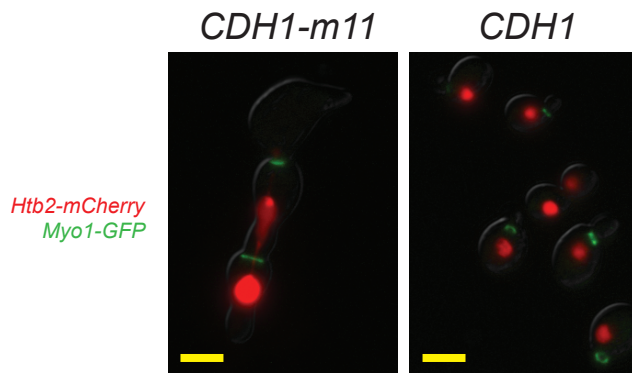

B

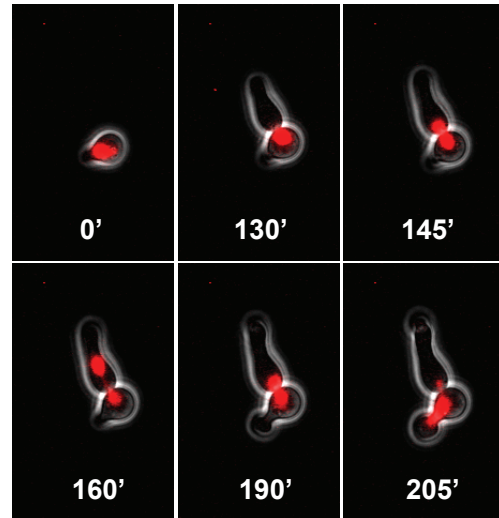

C

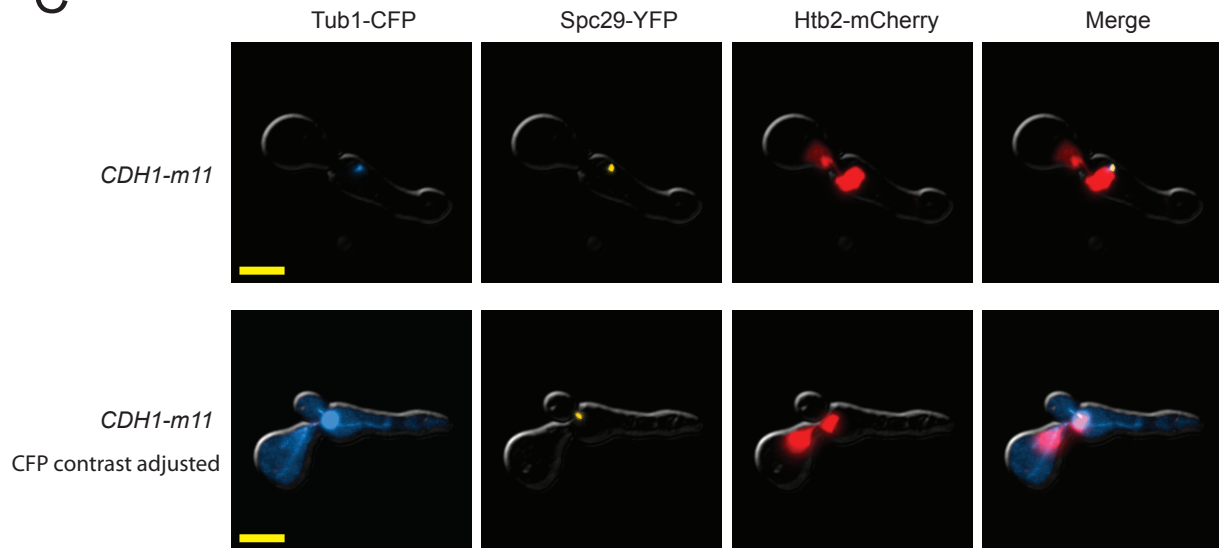

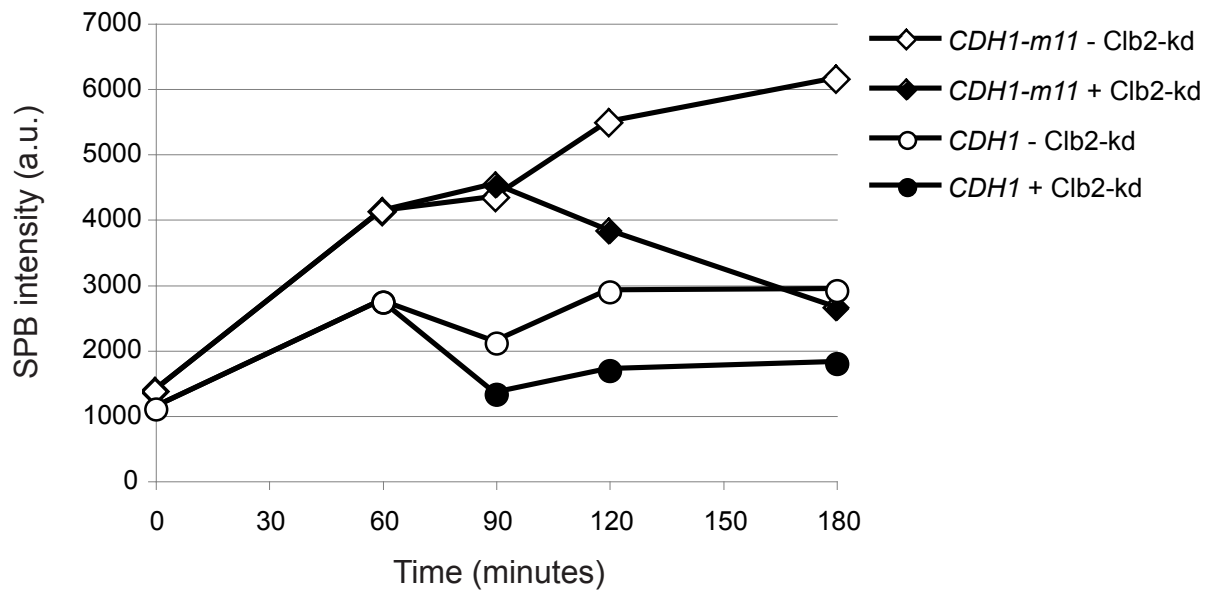



A

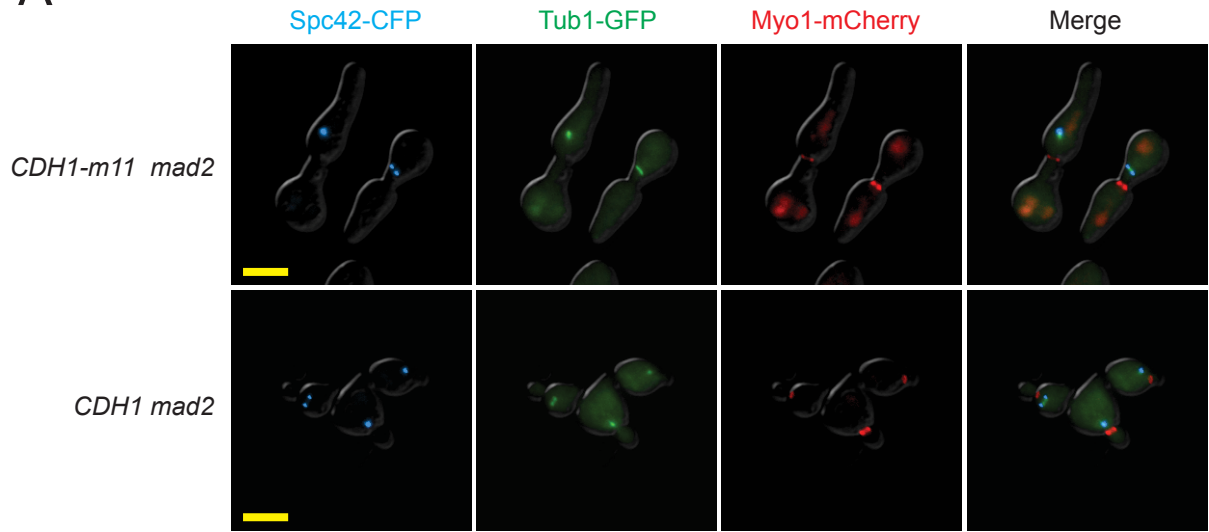

B

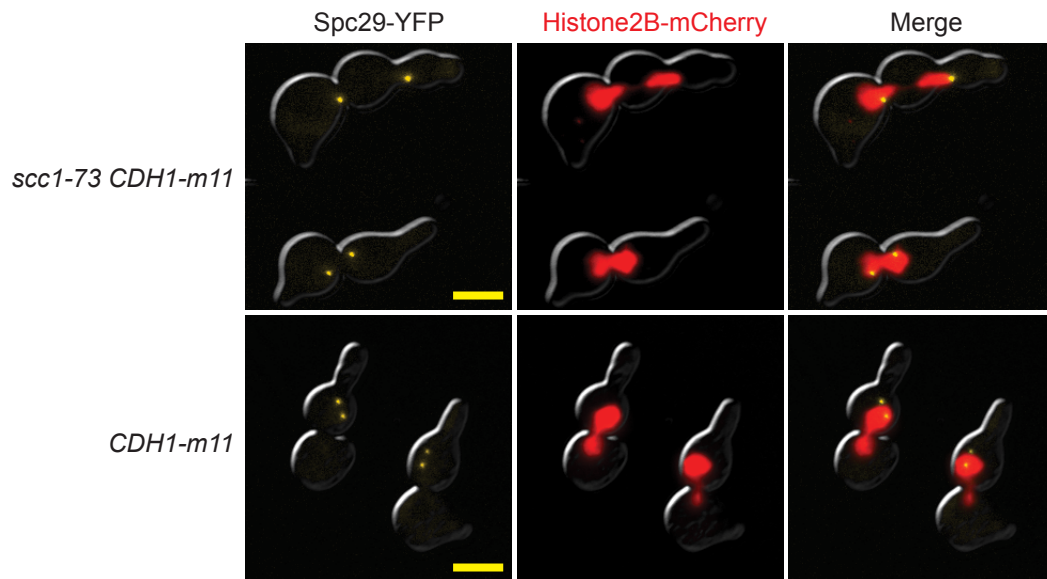

Supplement: E09-10-0901_1.pdf [file E09-10-0901_1.pdf]
